1  
2  
3  
4  
5  
6  
7  
8  
9  
10  
11  
12  
13  
14  
15  
16  
17  
18  
19  
20  
21  
22  
23

Is there a bilingual advantage in auditory attention among children? A systematic review and meta-analysis of standardized auditory attention tests

Wenfu Bao<sup>1, 2\*</sup>, Claude Alain<sup>3, 4, 5, 6</sup>, Michael Thaut<sup>2, 5, 6, 7</sup>, and Monika Molnar<sup>1, 2</sup>

<sup>1</sup> Department of Speech-Language Pathology, University of Toronto, Toronto, Ontario, Canada

<sup>2</sup> Rehabilitation Sciences Institute, University of Toronto, Toronto, Ontario, Canada

<sup>3</sup> Rotman Research Institute, Baycrest Health Centre, Toronto, Ontario, Canada

<sup>4</sup> Department of Psychology, University of Toronto, Toronto, Ontario, Canada

<sup>5</sup> Institute of Medical Sciences, University of Toronto, Toronto, Ontario, Canada

<sup>6</sup> Music and Health Science Research Collaboratory, University of Toronto, Toronto, Ontario, Canada

<sup>7</sup> Faculty of Music, University of Toronto, Toronto, Ontario, Canada

\* Corresponding author

E-mail: wenfu.bao@mail.utoronto.ca (WB)

## 24 **Abstract**

25           A wealth of research has investigated the effects of bilingualism on cognition, especially  
26 on executive function. Developmental studies reveal different cognitive profiles between  
27 monolinguals and bilinguals in (audio-)visual attention tasks, which might stem from their  
28 attention allocation differences. Yet, whether such distinction exists in the auditory domain alone  
29 is unknown. In this study, we compared differences in auditory attention, measured by  
30 standardized tests, between monolingual and bilingual children. A comprehensive literature  
31 search was conducted in three electronic databases: OVID Medline, OVID PsycInfo, and  
32 EBSCO CINAHL. Twenty studies using standardized tests to assess auditory attention in  
33 monolingual and bilingual participants aged less than 18 years were identified. We assessed the  
34 quality of these studies using a scoring tool for evaluating primary research. For statistical  
35 analysis, we pooled the effect size in a random-effects meta-analytic model, where between-  
36 study heterogeneity was quantified using the  $I^2$  statistic. No substantial publication bias was  
37 observed based on the funnel plot. Further, meta-regression modelling suggests that test measure  
38 (accuracy vs. response times) significantly affected the studies' effect sizes whereas other factors  
39 (e.g., participant age, stimulus type) did not. Specifically, studies reporting accuracy observed  
40 marginally greater accuracy in bilinguals ( $g = 0.10$ ), whereas those reporting response times  
41 indicated faster latency in monolinguals ( $g = -0.34$ ). There was little difference between  
42 monolingual and bilingual children's performance on standardized auditory attention tests. We  
43 also found that studies tend to include a wide variety of bilingual children but report limited  
44 language background information of the participants. This, unfortunately, limits the potential  
45 theoretical contributions of the reviewed studies. Recommendations to improve the quality of  
46 future research are discussed.

## 47 **Introduction**

48 Over the past decade, the growing body of research investigating the effects of  
49 bilingualism on cognition suggests that bilingual experience can shape the brain and cognitive  
50 systems [1, 2]. Some studies [3, 4] demonstrate that bilingual participants outperform their  
51 monolingual counterparts on a wide range of cognitive tasks while controlling for other factors,  
52 which is often interpreted as a bilingual advantage. For example, bilingual children develop  
53 conflict resolution ability earlier than monolinguals and perform better on memory tasks based  
54 on executive control [3] (but see [5] for equal performance in inhibitory tasks).

55 Cognition has many facets, among which executive function (EF) is most frequently  
56 measured in bilingual developmental studies [6]. Recent meta-analyses present mixed results  
57 about whether bilingualism confers an EF benefit in children. For instance, Gunnerud et al. [7]  
58 analyzed 143 studies examining different EF components in children aged 18 months through  
59 14.5 years; no bilingual advantage was found in overall EF after adjusting for publication bias.  
60 Similarly, Lowe et al. [8] reported a negligible effect of bilingualism on overall EF ( $g = -0.04$ ) in  
61 children aged between 3 and 17 years. It is worth noting that when addressing attention, nearly  
62 all studies included in these meta-analyses have focused on the (audio-)visual domain, and very  
63 few measure auditory attention through tools like behavioral tasks or standardized tests. Using  
64 the Bayesian statistical approach, Grundy [9] revealed that when group differences do appear on  
65 EF tasks, bilinguals outperform monolinguals far more likely than chance. Given these  
66 discrepant findings, the bilingual advantage appears small at best and might be subject to specific  
67 circumstances [10]. However, what these “circumstances” are remains unclear.

68 Addressing whether a general bilingual advantage exists is beyond the scope of this  
69 study. We do not intend to engage in a dichotomous discussion to this debate, as it oversimplifies

70 the effects of bilingualism on cognitive development. Nevertheless, we acknowledge that  
71 bilingualism can exert influence on cognition at least in some types of bilinguals, which has been  
72 supported by empirical studies [11, 12]. Further, attention has been hypothesized to be a  
73 plausible domain responsible for the bilingualism effects [2]. That is, the habitual use of two  
74 languages over years possibly enables bilinguals to become more practiced in managing conflicts  
75 and controlling attention. In particular, early bilingual exposure can affect how attention is  
76 allocated to the environment. For instance, infants growing up in bilingual homes pay more  
77 attention to subtle environmental differences [13, 14], which could improve their attentional  
78 processing [15].

79         However, a definition of attention remains vague in cognitive literature [16, 17]. Here,  
80 we conceptualize it as a system with three primary components: sustained attention, selective  
81 attention, and executive control [18, 19]. Specifically, based on Petersen and Posner [18],  
82 *sustained attention* (or alerting) refers to maintaining alertness over a long period of time, which  
83 is usually measured in the form of vigilance tasks that involve monitoring a target stimulus  
84 interspersed with non-targets. *Selective attention* (or orienting) refers to the ability to select  
85 certain input for enhanced processing while suppressing other irrelevant information, and thus is  
86 often measured by focusing on the target stimuli and ignoring the distractors. Lastly, *executive*  
87 *control* deals with resolving conflicts, shifting attention, and regulating thoughts and behavior.  
88 These components are also associated with different neural substrates in the human brain [18].

89         In bilingualism research, attention was not clearly conceptualized prior to a recent paper  
90 by Bialystok and Craik [16]. According to it, lifelong bilingual experience enhances attentional  
91 control, which is defined as a repertoire of processing operations that higher-level cognition  
92 utilizes to fulfill various goals [16]. However, visual or audio-visual attention has been primarily

93 studied in the past, whereas auditory attention has received little consideration. Though auditory  
94 attention is important to language processing and development: language is often processed  
95 through the auditory domain alone (e.g., speech perception), and infants start learning about  
96 language in utero without any visual support [20]. Likewise in the visual domain, bilingualism  
97 might also affect how auditory attention is allocated in bilingual children.

98         The current systematic review and meta-analysis assess whether there are reliable  
99 differences in auditory attention, measured by standardized tests, between monolingual and  
100 bilingual children. An initial search in our laboratory indicates that standardized tests are often  
101 used to assess children’s auditory attention in research and clinical settings [21], and are an ideal  
102 comparison across contexts given consistent administration guidelines. These tests use different  
103 experimental paradigms to target different auditory attention components. For example, the  
104 Go/No-Go task is often employed to assess sustained attention, during which participants are  
105 asked to respond in some conditions but not to respond in others. Accordingly, depending on the  
106 task, different outcome measures are reported, such as response speed and accuracy. In addition,  
107 these tests use different types of auditory stimuli, which are either linguistic (e.g., syllables,  
108 words) or non-linguistic (e.g., tones, animal sounds; see Results for further information).

109         As attention might support monolingual and bilingual development differently [2],  
110 investigating auditory attention in monolingual and bilingual children illuminates different  
111 adaptations to their language environments. Additionally, examining the bilingualism effects on  
112 auditory attention addresses the current literature gap by focusing on the auditory domain, which  
113 has been overlooked in prior attention research. Considering evidence on bilingualism  
114 modulating audiovisual speech processing [22], our prediction is that if auditory attention  
115 development is shaped by bilingual experience, bilingual children might have more accurate

116 and/or faster responses than their monolingual counterparts in standardized tests. We are also  
117 interested to explore whether the difference would vary by the attention components assessed.

118 An additional goal of our study is to determine whether certain bilingual characteristics  
119 (e.g., age of acquisition, language proficiency) mitigate the potential differences between  
120 monolinguals and bilinguals. Since the bilingualism effects are more evident among those with  
121 higher language proficiency and greater exposure [11, 12], we hypothesize that simultaneous  
122 bilinguals (i.e., children who learn both languages before the age of three) would more likely  
123 show enhanced auditory attention than sequential bilinguals (i.e., children who learn additional  
124 languages after the age of three). Finally, given that it is unclear whether bilingualism exerts  
125 influence beyond linguistic domain and standardized tests vary by stimulus type (linguistic vs.  
126 non-linguistic), we assess if different auditory stimuli affect attention performance in  
127 monolingual and bilingual children.

## 128 **Materials and methods**

129 This study is part of a larger systematic review that investigates auditory attention  
130 development from infancy to adolescence, in which the population's language experience (i.e.,  
131 monolingual vs. bilingual) and research methods are not controlled. The review protocol was  
132 registered a priori with OSF [21]. We followed the *Cochrane Handbook for Systematic Reviews*  
133 *of Interventions* [23] as the methods guidance, and developed the search strategy in consultation  
134 with a health sciences librarian. A PRISMA (Preferred Reporting Items for Systematic Reviews  
135 and Meta-Analyses) flow diagram illustrating the screening process is presented in Fig 1. The  
136 methods described below are specific to our current (more focused) literature search embedded  
137 in Bao and Molnar [21].

138

139 **Fig 1. PRISMA flow diagram presenting the study screening process.**

## 140 **Eligibility criteria**

141 To include the most relevant studies on auditory attention measured by standardized tests,  
142 we adhered to the following criteria when determining a study's eligibility:

- 143 ● Studies that used standardized tests to measure auditory attention were included.

144 *Standardized tests* are norm-referenced tests administered and scored in a consistent  
145 manner. Studies using non-standardized measures or focusing on visual attention and  
146 other cognitive abilities were excluded.

- 147 ● Studies that tested typically developing individuals below the age of 18 and had a  
148 monolingual group and a bilingual group were included. The bilingual group should be  
149 raised in bilingual families (i.e., at least one parent speaks another language than English  
150 to the child) or study in immersion schools where most of the curriculum is taught in an  
151 unfamiliar language. Studies only having monolingual or bilingual participants were  
152 excluded.

- 153 ● Studies that controlled for participants' age and socio-economic status (SES) were  
154 included, as both factors can affect children's cognitive measures independently [24].

- 155 ● Published, empirical studies that reported primary results in peer-reviewed articles were  
156 included.

- 157 ● Only articles written in English were included.

## 158 **Information sources and search**

159 A comprehensive literature search was conducted in three electronic databases: OVID  
160 Medline, OVID PsycInfo and EBSCO CINAHL. Search terms were defined after consulting the  
161 librarian and tailored to each database (see S1-S3 Tables). The search contained articles from the  
162 databases' start date up to March 8, 2023. Based on the search result of the larger systematic  
163 review, we identified all studies that compared monolingual and bilingual performance on  
164 standardized auditory attention tests. In addition, a manual search was performed by checking  
165 the reference lists of relevant articles, and an updated manual search was undertaken in Google  
166 Scholar to identify more studies.

## 167 **Study selection**

168 Records and data were managed using the Covidence systematic review software [25].  
169 Duplicates were identified and removed during reference importing and screening. Two  
170 independent reviewers screened studies in two phases: (1) title/abstract screening required to  
171 indicate “Yes,” “No” or “Maybe” for relevance; (2) full-text screening required to indicate  
172 “Include” or “Exclude” for eligibility and specify the exclusion reasons. If discrepancies  
173 occurred, a third reviewer was called to resolve the conflicts.

## 174 **Data collection**

175 For eligible studies, two independent reviewers extracted the following data items on  
176 Covidence: (1) sample size (monolingual vs. bilingual); (2) participant age; (3) language  
177 background (first and second language), bilingual type (simultaneous vs. sequential), and  
178 bilingualism assessment; (4) standardized tests used to assess auditory attention; (5) test measure



179 (accuracy vs. response times or RTs); (6) stimulus type (linguistic vs. non-linguistic); (7)  
180 auditory attention components measured; (8) reporting of SES. In the case of unclear or missing  
181 items, we contacted the investigators to confirm and obtain additional information. Afterwards, a  
182 third reviewer compared the data extracted by the two reviewers and built consensus: for items  
183 where there was a conflict, a final decision was made by selecting or entering the most accurate  
184 response. Then the consensus data was exported for analysis.

## 185 **Quality assessment**

186 The methodological quality of the studies was assessed by two independent reviewers  
187 using a modified version of the *Standard Quality Assessment Criteria for Evaluating Primary*  
188 *Research Papers: Quality Scoring for Quantitative Studies* (i.e., the “QualSyst” tool; [26]).  
189 Specifically, each study was evaluated according to 11 items based on description or reporting of  
190 objective, study design, participant selection, participant characteristics, outcome measure,  
191 analytic methods, estimate of variance, results, and conclusions, as well as sample size  
192 determination and confounding factors control. Each item was scored depending on the degree to  
193 which the specific criteria were met (“yes” = 2, “partial” = 1, “no” = 0), and then a summary  
194 score was calculated for each study and averaged between reviewers as the final rating. All  
195 studies received a score above 0.8, indicating high quality. Further, we used this tool to identify  
196 limitations of the reviewed studies and provide recommendations for future research.

## 197 **Data analysis**

198 Apart from a narrative synthesis of included data, we performed a meta-analysis on the  
199 pooled effect size using the “meta” package (version 5.2-0) [27] in *R* [28]. Specifically, we

200 extracted raw effect size data in the form of means and standard deviations of the two groups  
201 (monolingual and bilingual) from the included studies. In view of insufficient details being  
202 reported, we contacted the original investigators to obtain them or used the WebPlotDigitizer  
203 tool [29] to extract data from the graphs (e.g., in Krizman et al. [30]). As we anticipated  
204 considerable between-study heterogeneity, a random-effects model was built using the  
205 “metacont” function to pool effect sizes. Given that our effect size data was continuous, we used  
206 the restricted maximum-likelihood estimator [31] to calculate the heterogeneity variance  $\tau^2$ , and  
207 the Hedges method to calculate the standardized mean difference (i.e., Hedges’  $g$ ). To control for  
208 uncertainty in heterogeneity estimates, we used Knapp-Hartung adjustments [32] to calculate the  
209 confidence interval (CI) around the pooled effect. In terms of quantifying heterogeneity, we  
210 reported the  $I^2$  statistic (i.e., percentage of variability not caused by sampling error) [33] along  
211 with its confidence intervals, as suggested in [34].

212 To further explore sources of statistical heterogeneity, we built mixed-effects meta-  
213 regression models using the “metafor” package (version 3.0-2) [35]. Specifically, the dependent  
214 variable was the unbiased estimate of the population effect size Hedges’  $g$ , calculated for each  
215 study. The independent variables were test measure (binary: accuracy vs. RTs), stimulus type  
216 (binary: linguistic vs. non-linguistic), participant age (continuous, in years) and attention  
217 components (categorical: selective attention, sustained attention, executive control, or auditory  
218 attention overall). To evaluate the effects of these predictors, we conducted model comparison in  
219 a forward stepwise manner: a likelihood ratio test was performed using the *anova* function to  
220 compare a reduced model and a full model, which had one additional component. Specifically,  
221 we inspected the estimated  $p$ -value and Akaike’s Information Criterion (AIC) value to assess  
222 model performance (Bayesian Information Criterion or BIC is preferred over AIC when the

223 heterogeneity is large in the studies [36]). The full model was favored only when the difference  
224 was significant as indicated by the  $p$ -value (less than the conventional threshold of 0.05) and  
225 when it provided a better fit for the data as suggested by lower AIC value. For categorical  
226 variables that significantly predicted the effect size, subgroup analyses were conducted using the  
227 “meta” package and forest plots were generated to visualize the effects. Of note, a limitation of  
228 meta-regression is that it describes an observational association across studies rather than a  
229 causal relationship; thus its findings should be interpreted with caution [37, 38].

230 Furthermore, publication bias was analyzed for the included studies by means of the  
231 funnel plot, created using the “meta” package. The funnel plot displays the studies’ effect size  
232 against its standard error. Usually, symmetry indicates the absence of publication bias, which is  
233 reflected by data points scattered around the mean effect size forming an upside-down funnel  
234 [39]. This symmetry was further quantified through the Egger’s regression test.

## 235 **Results**

### 236 **Synthesis**

237 The database search yielded 634 records for title/abstract screening. Forty articles  
238 remained for full-text review, and three articles qualified for extraction. Our manual search  
239 contributed another nine articles, four of which did not appear in the database search as they  
240 were not indexed. In total, 12 articles were extracted, which included 20 studies (see Table 1).  
241 Note that studies from the same article represent independent effect sizes, because multiple  
242 factors, such as age, outcome measure, stimulus type, etc. were considered across these studies.

## 243 **Population characteristics**

244           With an age range between 5 to 14 years, participants can be categorized into  
245 preschoolers (5-6 years), primary school-aged children (7-11 years), and young adolescents (12-  
246 14 years). This categorization has considered different education systems across countries. For  
247 example, while primary school starts at the age of four in the Netherlands, the first two years are  
248 comparable to kindergarten. Therefore, the five-year-old children in Boerma et al. [40] and  
249 Kwakkel et al. [41] were treated as preschoolers. Table 1 presents a detailed description of all  
250 participants. Taking language background for an example, there are a great variety of first and  
251 second languages, with French-English and Spanish-English being the most common language  
252 combinations within bilinguals.

253 **Table 1. Descriptive statistics of included studies.**

| Study                    | Country         | Monolingual (n) | Bilingual (n) | Age (mean; years) | First language; second language                                                       | Bilingual type                                                                        | Bilingualism assessment                                                                 | Standardized test                          | Test measure | Stimulus type                 | Attention component                                         | SES                                                                                     |
|--------------------------|-----------------|-----------------|---------------|-------------------|---------------------------------------------------------------------------------------|---------------------------------------------------------------------------------------|-----------------------------------------------------------------------------------------|--------------------------------------------|--------------|-------------------------------|-------------------------------------------------------------|-----------------------------------------------------------------------------------------|
| Barbu et al. 2019        | Belgium         | 57              | 59            | 6                 | French; English                                                                       | Sequential* (French children enrolled in an immersion program since the age of 5)     | Customized language background questionnaire                                            | KiTAP: The Owls                            | RT           | Non-linguistic: animal sounds | Selective attention                                         | Matched for two groups, from diverse levels                                             |
| Boerma et al. 2017       | The Netherlands | 32              | 32            | 5                 | Turkish, Tarifit-Berber, Arabic; Dutch                                                | Sequential* (children learned Dutch as an L2 since the age of 4)                      | PaBiQ                                                                                   | IVA + Plus: Auditory task                  | Accuracy     | Linguistic: numbers           | Sustained attention                                         | No group difference                                                                     |
| Foy & Mann 2014 (1)      | USA             | 30              | 30            | 5                 | Spanish; English                                                                      | Simultaneous* (American children exposed to Spanish since at least 12 months of age)  | Customized language background questionnaire; Language Dominance Survey from EOWPVT-SBE | ACPT-P (modified): Verbal Go/No-Go task    | RT           | Linguistic: speech syllables  | Auditory attention (sustained attention, executive control) | Matched for two groups, all from low status                                             |
| Foy & Mann 2014 (2)      |                 |                 |               |                   |                                                                                       |                                                                                       |                                                                                         |                                            |              |                               |                                                             |                                                                                         |
| Foy & Mann 2014 (3)      |                 |                 |               |                   |                                                                                       |                                                                                       |                                                                                         |                                            |              |                               |                                                             |                                                                                         |
| Foy & Mann 2014 (4)      |                 |                 |               |                   |                                                                                       |                                                                                       |                                                                                         |                                            |              |                               |                                                             |                                                                                         |
| Garratt & Kelly 2007     | UK              | 27              | 27            | 7                 | English; Bengali, Urdu/Punjabi, Malay, Arabic                                         | Not reported                                                                          | Customized language background questionnaire                                            | NEPSY: Auditory Attention and Response Set | Accuracy     | Linguistic: words             | Auditory attention                                          | Comparable between two groups, most from low status                                     |
| Karlsson et al. 2015 (1) | Finland         | 25              | 24            | 7                 | Swedish; Finnish and other (“other” second languages were not specified in the study) | Simultaneous (almost all bilingual children learned both languages by the age of 3)   | Parental report                                                                         | NEPSY-II: Auditory Attention               | Accuracy     | Linguistic: words             | Selective and sustained attention                           | Matched for two groups, except that bilinguals had a higher level in the younger sample |
| Karlsson et al. 2015 (2) |                 |                 |               |                   |                                                                                       |                                                                                       |                                                                                         |                                            |              |                               |                                                             |                                                                                         |
| Karlsson et al. 2015 (3) |                 |                 |               |                   |                                                                                       |                                                                                       |                                                                                         |                                            |              |                               |                                                             |                                                                                         |
| Karlsson et al. 2015 (4) |                 |                 |               |                   |                                                                                       |                                                                                       |                                                                                         |                                            |              |                               |                                                             |                                                                                         |
| Krizman et al. 2012      | USA             | 25              | 23            | 14                | Spanish; English                                                                      | Simultaneous (children had their first exposure to both languages about the age of 3) | LEAP-Q                                                                                  | IVA + Plus: Auditory task                  | Accuracy     | Linguistic: numbers           | Sustained and selective attention                           | Matched for two groups                                                                  |
| Krizman et al. 2014      | USA             | 27              | 27            | 14                | Spanish; English                                                                      | Simultaneous (children learned both languages before/about the age of 3)              | LEAP-Q; parental report                                                                 | IVA + Plus: Auditory task                  | Accuracy     | Linguistic: numbers           | Attentional control                                         | 44% of monolinguals and 59% of bilinguals from low status                               |

|                         |                 |     |     |    |                                                                        |                                                                                   |                                      |                                                                |          |                               |                     |                                                     |
|-------------------------|-----------------|-----|-----|----|------------------------------------------------------------------------|-----------------------------------------------------------------------------------|--------------------------------------|----------------------------------------------------------------|----------|-------------------------------|---------------------|-----------------------------------------------------|
| Kwakkel et al. 2021     | The Netherlands | 80  | 89  | 5  | Dutch; English                                                         | Sequential* (Dutch children enrolled in a bilingual program since the age of 4)   | Parental questionnaire               | ACPT: Go/No-Go task                                            | Accuracy | Non-linguistic: tones         | Sustained attention | Matched for two groups, from high status overall    |
| Nicolay & Poncelet 2013 | Belgium         | 51  | 53  | 8  | French; English                                                        | Sequential* (French children enrolled in an immersion program since the age of 5) | Not explicitly assessed              | KiTAP: The Owls                                                | RT       | Non-linguistic: animal sounds | Selective attention | Matched for two groups, from medium and high levels |
| Nicolay & Poncelet 2015 | Belgium         | 50  | 51  | 8  | French; English                                                        | Sequential* (French children enrolled in an immersion program since the age of 5) | Not explicitly assessed              | KiTAP: The Owls                                                | RT       | Non-linguistic: animal sounds | Selective attention | Matched for two groups, from diverse levels         |
| Simonis et al. 2020 (1) | Belgium         | 129 | 156 | 12 | French; Dutch, English                                                 | Sequential* (French children enrolled in an immersion program since the age of 5) | Background information questionnaire | TEA-Ch: Code Transmission (adapted)                            | Accuracy | Linguistic: numbers           | Sustained attention | Bilinguals had higher SES                           |
| Simonis et al. 2020 (2) |                 | 153 | 173 |    |                                                                        |                                                                                   |                                      | TAP: Divided Attention (adapted)                               | Accuracy | Non-linguistic: tones         | Selective attention |                                                     |
| Simonis et al. 2020 (3) |                 |     |     |    |                                                                        |                                                                                   |                                      |                                                                | RT       |                               |                     |                                                     |
| Strydom et al. 2022     | South Africa    | 20  | 20  | 7  | Non-English (first languages were not specified in the study); English | Simultaneous* (children learned English as a second language before the age of 3) | Not explicitly assessed              | SAAT: Words Intelligibility by Picture Identification in quiet | Accuracy | Linguistic: words             | Selective attention | Same for two groups                                 |

254 PaBiQ: Parents of Bilingual Children Questionnaire. EOWPVT-SBE: Expressive One Word Picture Vocabulary Test – Spanish-  
 255 English Bilingual Edition. LEAP-Q: Language Experience and Proficiency Questionnaire. KiTAP: Test for Attentional Performance  
 256 for Children; IVA + Plus: Integrated Visual and Auditory Continuous Performance Test; ACPT: Auditory Continuous Performance  
 257 Test; ACPT-P: Auditory Continuous Performance Test-Preschoolers; TEA-Ch: Test of Everyday Attention for Children; TAP: Test  
 258 for Attentional Performance; NEPSY(-II): A Developmental Neuropsychological Assessment (Second Edition); SAAT: Selective  
 259 Auditory Attention Test.  
 260 Numbers following the names signify individual studies from the same article, which considers participant age, test measure, stimulus  
 261 type, and attention components.  
 262 \*Asterisk indicates that the bilingual type was not directly reported by the investigators but inferred from the original articles.

263           However, quality assessment suggests that there was not sufficient information reported  
264 about bilingual characteristics in the reviewed papers. For instance, bilingual type (simultaneous  
265 vs. sequential) was rarely reported, except that Karlsson et al. [42] and Krizman et al. [30, 43]  
266 recruited “early bilinguals.” Usually, bilingual children were from immigrant families learning  
267 the societal language as their second language (L2) [40, 44], or enrolled in immersion schools  
268 acquiring a foreign language [45-48]. Note that for longitudinal studies, we considered  
269 participants’ language condition when they were tested. For example, Nicoley and Poncelet [47]  
270 collected data at two time points; data from the second one (i.e., three years after immersion  
271 school enrollment) were included only, because children cannot be deemed bilingual yet during  
272 the initial testing when they just started the program. Generally, immersion school children were  
273 considered sequential bilinguals, as most of them were from a monolingual environment and did  
274 not learn an L2 until they started school. Furthermore, bilingual experience was often evaluated  
275 using parental questionnaires that focus on one aspect (e.g., language use, exposure, or  
276 proficiency), which led to inconsistent definitions of bilinguals and the difficulty of comparing  
277 them across studies.

278           SES was reported in all studies, and mostly assessed through education level of the  
279 mother or of both parents (parental occupation was also used occasionally, e.g., Garratt and  
280 Kelly [44]). Monolingual and bilingual participants had a comparable SES across articles, except  
281 in Simonis et al. [48] where the bilingual group had a higher SES than the monolingual group.  
282 Given no significant difference in test performance between the two groups, this article was  
283 included in the final analysis.

## 284 **Test characteristics**

285           Various standardized tests (see Table 1) were used to assess auditory attention.  
286    Considering how they were described in the included studies, we categorized them into the  
287    following three groups: (1) Test for Attentional Performance (TAP) [49], Test of Attentional  
288    Performance for Children (KiTAP) [50], and Selective Auditory Attention Test (SAAT) [51]:  
289    assess *selective attention*; (2) Integrated Visual and Auditory Continuous Performance Test (IVA  
290    + Plus) [52], Auditory Continuous Performance Test for Preschoolers (ACPT-P) [53], and Test  
291    of Everyday Attention for Children (TEA-Ch) [54]: assess *sustained attention*; (3)  
292    Developmental Neuropsychological Assessment (NEPSY) [55] and its second version (NEPSY-  
293    II) [56]: assess *auditory attention overall* (selective and sustained attention, and executive  
294    control). For tests evaluating audio-visual attention, we included data from subtests using only  
295    auditory stimuli. Further, we found that both linguistic and non-linguistic stimuli were utilized.  
296    For example, some tests used non-linguistic stimuli like auditory tones (TAP) and animal sounds  
297    (KiTAP; e.g., [45, 48]), whereas others employed linguistic stimuli such as numbers (IVA +  
298    Plus; TEA-Ch), speech syllables (ACPT-P), and words (NEPSY, NEPSY-II, SAAT; e.g., [30,  
299    40, , 43, 57]). Though it remains unknown whether different types of auditory stimuli affect  
300    attentional performance.

301           Moreover, some researchers used translated versions (e.g., Swedish version of NEPSY-II  
302    in [42]) or adapted the tests [48], and reported the assessed attention components differently. For  
303    example, modelled after ACPT-P, Foy and Mann [58] used an auditory Go/No-Go task with two  
304    blocks. We infer that the first block assessed sustained attention and the second one evaluated  
305    executive control, as the authors did not explicitly report the attention components. Using the  
306    same task, however, Kwakkel et al. [41] stated that they measured “sustained attention.”



307 Another source of variance we observed involved the test measure reported. All studies  
308 presented either accuracy or RTs, except that Simonis et al. [48] did both. Nevertheless, how  
309 accuracy was reported in different studies was not always consistent, even for the same test. For  
310 instance, Garratt and Kelly [44] reported standard scores for the Auditory Attention and  
311 Response Set subtests of NEPSY together, whereas Karlsson et al. [42] reported raw scores for  
312 each subtest of NEPSY-II individually. Simonis et al. [48] used decimal numbers to indicate  
313 accuracy (i.e., 1 = 100% accuracy), whereas Kwakkel et al. [41] used reversed omission scores.  
314 Despite these discrepancies, for all accuracy statistics in this meta-analysis, larger values indicate  
315 better auditory attention. However, we did not include data that were presented in other forms  
316 and could not be converted to accuracy scores or proportions, e.g., misses in Foy and Mann [58]  
317 and errors in Barbu et al. [45].

## 318 **Meta-analysis**

319 Effect size was pooled in the meta-analysis. According to the random-effects model (see  
320 S4 Table), the between-study heterogeneity variance was estimated at  $\tau^2 = 0.09$  (95% CI: 0.03-  
321 0.29), with an  $I^2$  value of 65.8% (95% CI: 45.1-78.6%) that indicates moderate to substantial  
322 heterogeneity. Meta-regression modelling was further implemented to address the heterogeneity  
323 effect between studies. We first built a mixed-effects model, with each study's effect size as the  
324 dependent variable and test measure as the moderator. Model summary suggested that test  
325 measure significantly influenced the studies' effect size ( $p = 0.0067$ ; see S5 Table). Further,  
326 results of a subgroup analysis confirmed that there was a significant difference in effect size  
327 between studies reporting accuracy (i.e., accuracy studies) and studies reporting RTs (i.e., RT  
328 studies;  $p = 0.0014$ ; see S6 Table). Fig 2 shows a forest plot stratified by test measure: bilingual

329 children presented more accurate responses in accuracy studies ( $g = 0.10$ ), but slower latency in  
330 RT studies ( $g = -0.34$ ) than their monolingual counterparts. However, results favored  
331 monolingual children ( $g = -0.09$ ) in standardized auditory attention tests when taking both  
332 measures together.

333

334 **Fig 2. Forest plot stratified by test measure, based on random-effects meta-analytic model**

335 **analysis.** The upper and lower panels display the results for accuracy studies ( $n = 12$ ) and RT  
336 studies ( $n = 8$ ), respectively.

337

338 To investigate the effects of other variables, we divided our data into two subsets (i.e.,  
339 accuracy studies and RT studies) and analyzed them separately. For accuracy studies ( $n = 12$ ), a  
340 meta-regression model with participant age as the predictor was built. Age did not influence the  
341 effect size significantly ( $p = 0.1282$ ; see S7 Table). However, a positive trend favoring young  
342 bilingual adolescents was observed (see S1 Fig). Following the same approach, we tested the  
343 effects of stimulus type and attention components, but neither of them was significant (stimulus  
344 type:  $p = 0.9550$ ; attention components:  $p = 0.4865$ ; see S8 and S9 Tables). For RT studies ( $n =$   
345  $8$ ), none of the variables above was significant (participant age:  $p = 0.2056$ , stimulus type:  $p =$   
346  $0.5494$ , attention components:  $p = 0.9396$ ; see S10-S12 Tables). In addition, there was not  
347 substantial publication bias in our data according to the funnel plot (S2 Fig), which was further  
348 confirmed by the result of Egger's regression test ( $p = 0.414$ ; see S13 Table). However, we did  
349 not include unpublished research, which is a potential limitation.

## 350 **Discussion**

351           The current systematic review and meta-analysis analyzed 20 studies that compared  
352 monolingual and bilingual children's performance on standardized auditory attention tests.  
353 Results suggest that test measure was significantly related to differences in effect sizes: accuracy  
354 studies ( $n = 12$ ) indicated marginally greater accuracy in bilinguals, whereas RT studies ( $n = 8$ )  
355 indicated faster responses in monolinguals. However, no other factors (i.e., participant age,  
356 stimulus type, attention components) resulted in significant differences or interactions. Overall,  
357 there was little difference between monolingual and bilingual children's performance on  
358 standardized auditory attention tests. This finding is consistent with those of Gunnerud et al. [7]  
359 and Lowe et al. [8], though both of them analyzed tasks focusing on visual attention.

360           In answer to the question in the title, a bilingual advantage in auditory attention, when  
361 measured using standardized tests, likely does not exist or is limited to certain conditions (e.g.,  
362 accuracy measure or more proficient bilinguals). To be fair in our interpretation of this finding,  
363 two points should be considered: (1) a very heterogeneous bilingual population was synthesized  
364 across studies, wherein bilingualism was poorly assessed; (2) most standardized tests are  
365 developed for monolingual English speakers, thus they might not be suitable to measure  
366 bilinguals. As far as we know, there is no clear theoretical framework where we could place our  
367 results directly or interpret possible bilingual advantages [59]. Our work, however, contributes to  
368 the field by uncovering the relation between bilingualism and auditory attention.

369           In the reviewed papers, standardized auditory attention tests were administered to  
370 participants as young as five years of age, and to children (5-11 years) more often than to young  
371 adolescents (12-14 years). Monolingual children seemingly had faster RTs, but bilingual children  
372 showed somewhat higher accuracy. Prior work from other domains than auditory attention has

373 presented mixed findings about the RT difference between groups. For instance, Bialystok et al.  
374 [60] used the Simon task—a non-linguistic interference task—and observed faster latency in  
375 bilingual children, although this effect was later only found when the demands for inhibitory  
376 control were high [61]. However, studies using language processing tasks show longer RTs in  
377 bilingual adults. For example, bilinguals have slower RTs to target words during a lexical  
378 decision task [62], and perform more slowly in a picture naming task than monolinguals [63].  
379 These linguistic tasks specifically measure cross-language interference and switching, and  
380 bilinguals' slower RTs have been often associated with their need to navigate more than one  
381 language system.

382         In our meta-analysis, bilingual children seemed to have slightly more accurate responses,  
383 but at the cost of longer latency relative to their monolingual peers. However, these findings  
384 should be interpreted with caution, because most accuracy and RT measures were derived from  
385 different studies across the reviewed articles. Only Simonis et al. [48] reported both measures,  
386 but neither accuracy nor latency showed group differences between monolingual and bilingual  
387 children in their study. To draw a firm conclusion on the relationship between accuracy and RTs,  
388 one should only consider studies that report both measures within the same group.

389         With regards to the measured auditory attention components, selective attention and  
390 sustained attention are mostly assessed, followed by executive control. While one may argue that  
391 it is hard to disentangle these components and measure them independently, we distinguished  
392 them by considering the specific tasks used by investigators and the attention model developed  
393 by Posner and colleagues [18]. We also noticed inconsistency across publications when reporting  
394 the measured components with a given test. For example, using the auditory section of IVA +  
395 Plus, Krizman et al. [43] measured “attentional control,” whereas Boerma et al. [40] assessed

396 “sustained attention.” This observation is in line with Williams et al. [6] who also found  
397 variation in targeted cognitive abilities for the same task in bilingualism research.

398         Moreover, rarely were sufficient details about participants’ bilingual background  
399 reported. This is problematic because differences in language experience (e.g., age of  
400 acquisition, proficiency; [4, 11, 64]) can affect cognitive performance. For example, more  
401 proficient bilinguals tend to exhibit a positive influence of bilingualism. Consistent with this, we  
402 observed a trend of the bilingual advantage toward adolescents relative to younger children,  
403 which can be explained by the fact that bilingual children become more proficient in their  
404 languages when growing older.

405         In addition, bilingualism was poorly assessed and hardly deemed a continuum. We  
406 identified two common themes: (1) most language background questionnaires fail to assess  
407 bilingualism comprehensively (i.e., including the use of, exposure to, and proficiency of each  
408 language; see [30]); (2) bilingual participants are usually recruited as a comparison group to  
409 monolinguals, without explaining inclusion criteria. This practice overlooks the nuances within  
410 bilinguals. For example, an English L2 learner from Spain is not comparable to a Spanish  
411 heritage speaker from the U.S., although both considered as Spanish-English bilinguals. Thus,  
412 variance in different bilingual communities should be considered, captured, and reported in  
413 future work.

414         In future studies, bilingualism should be considered as a continuum, and bilingual  
415 variables should be appropriately assessed and reported. This will facilitate our understanding of  
416 how various facets of bilingualism (e.g., age of acquisition, language proficiency, language  
417 exposure, language use, etc.) interact with auditory attention development. Moreover, further  
418 investigation should test monolinguals and bilinguals across age groups and report both accuracy

419 and RTs. Given that most tests are designed for monolingual English speakers, we also advocate  
420 for developing tests that are normed to assess both monolinguals and bilinguals. Lastly, there  
421 was little consistency regarding the targeted attention components even for the same test across  
422 publications, which may be due to the lack of a clear definition of attention in the field itself.  
423 Therefore, we need to consider further what attention along with its components refers to in  
424 (bilingualism) research and theoretical models.

425

## 426 **References**

- 427 1. Anderson JAE, Grundy JG, Grady CL, Craik FIM, Bialystok E. Bilingualism contributes  
428 to reserve and working memory efficiency: evidence from structural and functional  
429 neuroimaging. *Neuropsychologia*. 2021 Dec 10;163:108071. doi:  
430 10.1016/j.neuropsychologia.2021.108071. Epub 2021 Oct 27. PMID: 34715120.
- 431 2. Bialystok E. The bilingual adaptation: how minds accommodate experience. *Psychol*  
432 *Bull*. 2017 Mar;143(3):233-62. doi: 10.1037/bul0000099. PMID: 28230411.
- 433 3. Bialystok E. Bilingualism: the good, the bad, and the indifferent. *Biling (Camb Engl)*.  
434 2009;12(1):3-11. doi: 10.1017/s1366728908003477.
- 435 4. Tse CS, Altarriba J. The relationship between language proficiency and attentional  
436 control in Cantonese-English bilingual children: evidence from Simon, Simon switching,  
437 and working memory tasks. *Front Psychol*. 2014 Sep 3;5:954. doi:  
438 10.3389/fpsyg.2014.00954. PMID: 25232345.
- 439 5. Dunabeitia JA, Hernandez JA, Anton E, Macizo P, Estevez A, Fuentes LJ, Carreiras M.  
440 The inhibitory advantage in bilingual children revisited: myth or reality? *Exp Psychol*.

- 441           2014;61(3):234-51. doi: 10.1027/1618-3169/a000243. PMID: 24217139.
- 442           6. Williams L, Parthasarathy P, Molnar M. Measures of bilingual cognition - from infancy  
443           to adolescence. *J Cogn*. 2021 Aug 26;4(1):45. doi: 10.5334/joc.184. PMID: 34514316.
- 444           7. Gunnerud HL, Ten Braak D, Reikeras EKL, Donolato E, Melby-Lervag M. Is  
445           bilingualism related to a cognitive advantage in children? A systematic review and meta-  
446           analysis. *Psychol Bull*. 2020 Dec;146(12):1059-83. doi: 10.1037/bul0000301. Epub 2020  
447           Sep 10. PMID: 32914991.
- 448           8. Lowe CJ, Cho I, Goldsmith SF, Morton JB. The bilingual advantage in children's  
449           executive functioning is not related to language status: a meta-analytic review. *Psychol*  
450           *Sci*. 2021 Jul;32(7):1115-46. doi:10.1177/0956797621993108. Epub 2021 Jul 2. PMID:  
451           34213379.
- 452           9. Grundy JG. The effects of bilingualism on executive functions: an updated quantitative  
453           analysis. *J Cult Cogn Sci*. 2020 Aug;4(2):177-99. doi: 10.1007/s41809-020-00062-5.
- 454           10. de Bruin A, Dick AS, Carreiras M. Clear theories are needed to interpret differences:  
455           perspectives on the bilingual advantage debate. *Neurobiol Lang (Camb)*. 2021  
456           Dec;2(4):433-51. doi: 10.1162/nol\_a\_00038.
- 457           11. Festman J, Czapka S, Winsler A. How many moderators does it take till we know ... that  
458           too many bilingual advantage effects have died? In Kersten K, Winsler A, editors.  
459           *Understanding variability in second language acquisition, bilingualism, and cognition*.  
460           New York: Routledge; 2022. p. 80-127.
- 461           12. Crivello C, Kuzyk O, Rodrigues M, Friend M, Zesiger P, Poulin-Dubois D. The effects of  
462           bilingual growth on toddlers' executive function. *J Exp Child Psychol*. 2016 Jan;141:121-  
463           32. doi: 10.1016/j.jecp.2015.08.004. Epub 2015 Sep 22. PMID: 26402219.

- 464 13. Kuipers JR, Thierry G. Bilingualism and increased attention to speech: evidence from  
465 event-related potentials. *Brain Lang.* 2015 Oct;149:27-32.  
466 doi:10.1016/j.bandl.2015.07.004. Epub 2015 Jul 13. PMID: 26185046.
- 467 14. Sebastian-Galles N, Albareda-Castellot B, Weikum WM, Werker JF. A bilingual  
468 advantage in visual language discrimination in infancy. *Psychol Sci.* 2012 Sep  
469 1;23(9):994-9. doi: 10.1177/0956797612436817. Epub 2012 Jul 18. PMID: 22810164.
- 470 15. Bialystok E. Bilingualism and the development of executive function: the role of  
471 attention. *Child Dev Perspect.* 2015 Jun 1;9(2):117-21. doi: 10.1111/cdep.12116. PMID:  
472 26019718.
- 473 16. Bialystok E, Craik FIM. How does bilingualism modify cognitive function? Attention to  
474 the mechanism. *Psychon Bull Rev.* 2022 Aug;29(4):1246-69. doi: 10.3758/s13423-022-  
475 02057-5. Epub 2022 Jan 28. PMID: 35091993.
- 476 17. Styles E. *The psychology of attention.* 2nd ed. London: Psychology Press; 2006.
- 477 18. Petersen SE, Posner MI. The attention system of the human brain: 20 years after. *Annu*  
478 *Rev Neurosci.* 2012;35(1):73-89. doi: 10.1146/annurev-neuro-062111-150525. Epub  
479 2012 Apr 12. PMID: 22524787.
- 480 19. Alain C, Arnott SA, Dyson B. Varieties of auditory attention. In: Ochsner KN, Kosslyn S,  
481 editors. *The Oxford handbook of cognitive neuroscience, volume 1: core topics.* New  
482 York: Oxford University Press; 2013. p. 215-36.
- 483 20. Moon C, Lagercrantz H, Kuhl PK. Language experienced in utero affects vowel  
484 perception after birth: a two-country study. *Acta Paediatr.* 2003 Feb;102(2):156-60. Doi:  
485 10.1111/apa.12098. Epub 2013 Jan 9. PMID: 23173548.
- 486 21. Bao W, Molnar M. Auditory attention development from infancy to adolescence: a



- 487 systematic review protocol. OSF [Preprint]. 2021 [cited 2023 Mar 17]. Available from  
488 <https://doi.org/10.17605/OSF.IO/GWKUQ>.
- 489 22. Pons F, Bosch L, Lewkowicz DJ. Bilingualism modulates infants' selective attention to  
490 the mouth of a talking face. *Psychol Sci*. 2015 Apr;26(4):490-8. doi:  
491 10.1177/0956797614568320. Epub 2015 Mar 12. PMID: 25767208; PMCID:  
492 PMC4398611.
- 493 23. McKenzie JE, Brennan SE. *Cochrane handbook for systematic reviews of interventions*.  
494 2nd ed. Chichester (UK): John Wiley & Sons; 2019. Chapter 12, Synthesizing and  
495 presenting findings using other methods; p. 321-47.
- 496 24. Calvo A, Bialystok E. Independent effects of bilingualism and socioeconomic status on  
497 language ability and executive functioning. *Cognition*. 2014 Mar;130(3):278-88. doi:  
498 10.1016/j.cognition.2013.11.015. Epub 2013 Dec 25. PMID: 24374020.
- 499 25. Covidence. Covidence systematic review software, Veritas Health Innovation.  
500 Melbourne, Australia; 2021. Available from: <http://www.covidence.org>
- 501 26. Kmet LM, Lee RC, Cook LS. Standard quality assessment criteria for evaluating primary  
502 research papers from a variety of fields. Alberta Heritage Foundation for Medical  
503 Research. Alberta, Canada; 2004. Available from <https://doi.org/10.7939/R37M04F16>.
- 504 27. Balduzzi S, Rucker G, Schwarzer G. How to perform a meta-analysis with R: a practical  
505 tutorial. *Evid Based Ment Health*. 2019 Nov;22(4):153-60. Doi: 10.1136/ebmental-2019-  
506 300117. Epub 2019 Sep 28.
- 507 28. R Core Team. R: a language and environment for statistical computing [Internet].  
508 Vienna, Austria: R Foundation for Statistical Computing; 2021. Available from:  
509 <http://www.R-Project.org>.

- 510 29. Rohatgi A. WebPlotDigitizer. Version 4.6 [software]. 2022 Sep [cited 2023 Mar 17].  
511 Available from: <https://automeris.io/WebPlotDigitizer>.
- 512 30. Krizman J, Marian V, Shook A, Skoe E, Kraus N. Subcortical encoding of sound is  
513 enhanced in bilinguals and relates to executive function advantages. *Proc Natl Acad Sci*  
514 *USA*. 2012 May 15;109(20):7877-81. doi:10.1073/pnas.1201575109. Epub 2012 Apr 30.  
515 PMID: 22547804.
- 516 31. Viechtbauer W. Bias and efficiency of meta-analytic variance estimators in the random-  
517 effects model. *J Edu Behav Stat*. 2005 Sep;30(3):261-93. doi:  
518 10.3102/1076998603000326.
- 519 32. Knapp G, Hartung J. Improved tests for a random effects meta-regression with a single  
520 covariate. *Stat Med*. 2003 Sep 15;22(17):2693-710. doi: 10.1002/sim.1482. PMID:  
521 12939780.
- 522 33. Higgins JP, Thompson SG. Quantifying heterogeneity in a meta-analysis. *Stat Med*. 2002  
523 Jun 15;21(11):1539-58. doi: 10.1002/sim.1186. PMID: 12111919.
- 524 34. Ioannidis JP, Patsopoulos NA, Evangelou E. Uncertainty in heterogeneity estimates in  
525 meta-analyses. *BMJ*. 2007 Nov 3;335(7626):914-6. doi: 10.1136/bmj.39343.408449.80.  
526 PMID: 17974687; PMCID: PMC2048840.
- 527 35. Viechtbauer W. Conducting meta-analyses in R with the metafor package. *J Stat Softw*.  
528 2010 Aug; 36(3):1-48. doi: 10.18637/jss.v036.i03.
- 529 36. Brewer MJ, Bulter A, Cooksley SL. The relative performance of AIC, AICc and BIC in  
530 the presence of unobserved heterogeneity. *Methods Ecol Evol*. 2016;7(6):679-92. doi:  
531 10.1111/2041-210x.12541.
- 532 37. Baker WL, White CM, Cappelleri JC, Kluger J, Coleman CI; Health Outcomes, Policy,

- 533 and Economics (HOPE) Collaborative Group. Understanding heterogeneity in meta-  
534 analysis: the role of meta-regression. *Int J Clin Pract*. 2009 Oct;63(10):1426-34. doi:  
535 10.1111/j.1742-1241.2009.02168.x. PMID: 19769699.
- 536 38. Spineli LM, Pandis N. Problems and pitfalls in subgroup analysis and meta-regression.  
537 *Am J Orthod Dentofacial Orthop*. 2020 Dec;158(6):901-904. doi:  
538 10.1016/j.ajodo.2020.09.001. PMID: 33250104.
- 539 39. Balduzzi S, Rucker G, Schwarzer G. How to perform a meta-analysis with R: a practical  
540 tutorial. *Evid Based Ment Health*. 2019 Nov;22(4):153-60. doi: 10.1136/ebmental-2019-  
541 300117. Epub 2019 Sep 28. PMID: 31563865.
- 542 40. Boerma T, Leseman P, Wijnen F, Blom E. Language proficiency and sustained attention  
543 in monolingual and bilingual children with and without language impairment. *Front*  
544 *Psychol*. 2017 Jul 21;8:1241. doi: 10.3389/fpsyg.2017.01241. PMID: 28785235.
- 545 41. Kwakkel H, Droop M, Verhoeven L, Segers E. The impact of lexical skills and executive  
546 functioning on L1 and L2 phonological awareness in bilingual kindergarten. *Learn*  
547 *Individ Differ*. 2021;88:102009. doi:10.1016/j.lindif.2021.102009.
- 548 42. Karlsson LC, Soveri A, Rasanen P, Karna A, Delatte S, Lagerstrom E, Mard L,  
549 Steffansson M, Lehtonen M, Laine M. Bilingualism and performance on two widely used  
550 developmental neuropsychological test batteries. *PLoS One*. 2015 Apr  
551 29;10(4):e0125867. doi:10.1371/journal.pone.0125867. PMID: 25922937.
- 552 43. Krizman J, Skoe E, Marian V, Kraus N. Bilingualism increases neural response  
553 consistency and attentional control: evidence for sensory and cognitive coupling. *Brain*  
554 *Lang*. 2014 Jan;128(1):34-40. doi:10.1016/j.bandl.2013.11.006. Epub 2014 Jan 9. PMID:  
555 24413593.

- 556 44. Garratt LC, Kelly TP. To what extent does bilingualism affect children's performance on  
557 the NEPSY? *Child Neuropsychol.* 2007;14(1):71-81. doi: 10.1080/09297040701218405.  
558 PMID: 17852119.
- 559 45. Barbu C, Gonzalez A, Gillet S, Poncelet M. Cognitive advantage in children enrolled in a  
560 second-language immersion elementary school program for one year. *Psychol Belg.* 2019  
561 Oct 21;59(1):416-35. doi: 10.5334/pb.469. Erratum in: *Psychol Belg.* 2020 Jan  
562 27;60(1):35-6. PMID: 31709070.
- 563 46. Nicolay AC, Poncelet M. Cognitive advantage in children enrolled in a second-language  
564 immersion elementary school program for three years. *Biling (Camb Engl).*  
565 2013;16(3):597-607. doi: 10.1017/s1366728912000375.
- 566 47. Nicolay AC, Poncelet M. Cognitive benefits in children enrolled in an early bilingual  
567 immersion school: a follow-up study. *Biling (Camb Engl).* 2015;18(4):789-95. doi:  
568 10.1017/s1366728914000868.
- 569 48. Simonis M, Galand B, Hiligsmann P, Szmalec A. Attentional abilities of children  
570 enrolled in immersion education in French-speaking Belgium. *Int J Biling Educ Biling.*  
571 2020;1-18. doi: 10.1080/13670050.2020.1856033.
- 572 49. Zimmermann P, Fimm B. Test for attentional performance (TAP). Herzogenrath: Psytest;  
573 1995.
- 574 50. Zimmermann P, Gondan M, Fimm B. Test of attentional performance for children  
575 (KiTAP). Herzogenrath: Psytest; 2005.
- 576 51. Cherry R. Selective auditory attention test. St. Louis: Auditec of St. Louis; 1980.
- 577 52. Sandford JA, Turner A. IVA + Plus: integrated visual and auditory continuous  
578 performance test administration manual. Richmond: Brain Train; 2004.

- 579 53. Mahone EM, Pillion JP, Hiemenz JR. Initial development of an auditory continuous  
580 performance test for preschoolers. *J Atten Disord.* 2001;5(2):93-106.  
581 doi:10.1177/108705470100500203.
- 582 54. Manly T, Robertson IH, Anderson V, Nimmo-Smith I. TEA-Ch: the test of everyday  
583 attention for children manual. Bury St. Edmunds, UK: Thames Valley Test Company;  
584 1999.
- 585 55. Korkman M, Kirk U, Kemp S. NEPSY: A developmental neuropsychological  
586 assessment. San Antonio: The Psychological Corporation; 1998.
- 587 56. Korkman M, Kirk U, Kemp S. NEPSY-II (2nd ed.). San Antonio: Harcourt Assessment;  
588 2007.
- 589 57. Strydom L, Pottas L, Soer M, Graham MA. Effects of language experience on selective  
590 auditory attention and speech-in-noise perception among English second language  
591 learners: preliminary findings. *Int J Pediatr Otorhinolaryngol.* 2022 Mar;154:111061. doi:  
592 10.1016/j.ijporl.2022.111061. Epub 2022 Feb 7. PMID: 35149369.
- 593 58. Foy JG, Mann VA. Bilingual children show advantages in nonverbal auditory executive  
594 function task. *Int J Biling.* 2014 Nov;18(6):717-29. doi: 10.1177/1367006912472263.
- 595 59. Blanco-Elorrieta E, Caramazza A. On the need for theoretically guided approaches to  
596 possible bilingual advantages: an evaluation of the potential loci in the language and  
597 executive control systems. *Neurobiol Lang (Camb).* 2021;2(4):452-63. doi:  
598 10.1162/nol\_a\_00041.
- 599 60. Bialystok E, Martin MM, Viswanathan M. Bilingualism across the lifespan: the rise and  
600 fall of inhibitory control. *Int J Biling.* 2005 Mar;9(1):103-19. doi:  
601 10.1177/13670069050090010701.

- 602 61. Martin-Rhee MM, Bialystok E. The development of two types of inhibitory control in  
603 monolingual and bilingual children. *Biling (Camb Engl)*. 2008;11(1):81-93.  
604 doi:10.1017/s1366728907003227.
- 605 62. Soares C, Grosjean F. Bilinguals in a monolingual and a bilingual speech mode: the  
606 effect on lexical access. *Mem Cognit*. 1984 Jul;12(4):380-6. doi: 10.3758/bf03198298.  
607 PMID: 6503701.
- 608 63. Gollan TH, Montoya RI, Fennema-Notestine C, Morris SK. Bilingualism affects picture  
609 naming but not picture classification. *Mem Cognit*. 2005 Oct;33(7):1220-34. doi:  
610 10.3758/BF03193224. PMID: 16532855.
- 611 64. Sabourin L, Vinerte S. The bilingual advantage in the Stroop task: simultaneous vs. early  
612 bilinguals. *Biling (Camb Engl)*. 2015;18(2):350-5. doi: 10.1017/s1366728914000704.

613

614

## 615 **Supporting information**

616 **S1 Checklist. PRISMA 2020 checklist.**

617 **S1 Fig. Forest plot stratified by participant age groups, based on random-effects model**

618 **analysis.** Green lines represent accuracy studies, and blue lines represent RT studies.

619 **S2 Fig. Contour-enhanced funnel plot.** Effect size (i.e., standardized mean difference or SMD)

620 is plotted against its standard error. Each dot represents an individual study. Grey-shaded areas

621 indicate different *p*-value intervals.

622 **S1 Table. Search terms used in the electronic databases under the concept of “auditory**

623 **attention”.**

624 **S2 Table. Search terms used in the electronic databases under the concept of “population”.**

625 **S3 Table. Search terms used in the electronic databases under the concept of “study types**  
626 **and methods”.**

627 **S4 Table. Random-effects meta-analytic model summary.**

628 **S5 Table. Mixed-effects meta-regression model summary, with test measure as the**  
629 **moderator.**

630 **S6 Table. Subgroup analysis result, stratified by test measure.**

631 **S7 Table. Mixed-effects meta-regression model summary for accuracy studies, with**  
632 **participant age as the moderator.**

633 **S8 Table. Mixed-effects meta-regression model summary for accuracy studies, with**  
634 **stimulus type as the moderator.**

635 **S9 Table. Mixed-effects meta-regression model summary for accuracy studies, with**  
636 **attention components as the moderator.**

637 **S10 Table. Mixed-effects meta-regression model summary for RT studies, with participant**  
638 **age as the moderator.**

639 **S11 Table. Mixed-effects meta-regression model summary for RT studies, with stimulus**  
640 **type as the moderator.**

641 **S12 Table. Mixed-effects meta-regression model summary for RT studies, with attention**  
642 **components as the moderator.**

643 **S13 Table. Egger’s regression test result.**

## Identification of studies via databases and manual search

Identification

Electronic database searches:  
OVID Medline (n = 8605),  
OVID PsycInfo (n = 6055),  
EBSCO CINAHL (n = 5455)  
  
Records identified in total (n = 20115)

Duplicate records removed *before screening*  
(n = 3487)

Screening

Titles / abstracts screened (n = 16628)

Irrelevant records excluded (n = 15491)

Full-text articles assessed for eligibility  
(n = 1137)

Records excluded: (n = 1067)  
Wrong population: not focusing on typically  
developing children (n = 467)  
Wrong outcomes: not focusing on auditory  
attention (n = 500)  
Wrong study type: not empirical studies (n =  
36)  
Not written in English (n = 49)  
Study unavailable (n = 13)  
Duplicate (n = 2)

Included

Articles included in review (n = 70)

Articles fitting current inclusion  
criteria (n = 3)

Articles identified through manual  
search (n = 9)

Articles included in the analysis: (n = 12)  
Studies included in the analysis: (n = 20)



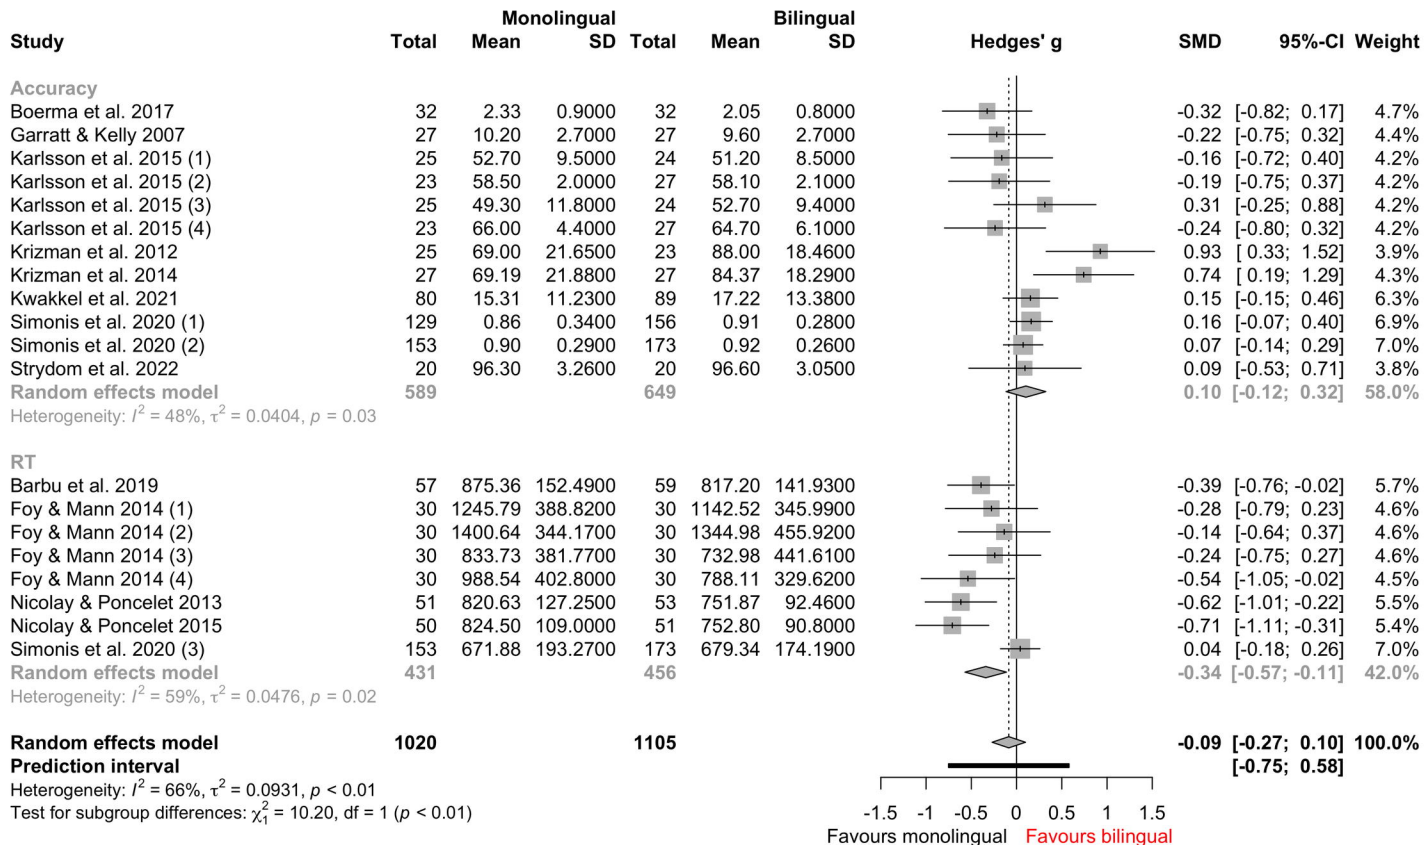

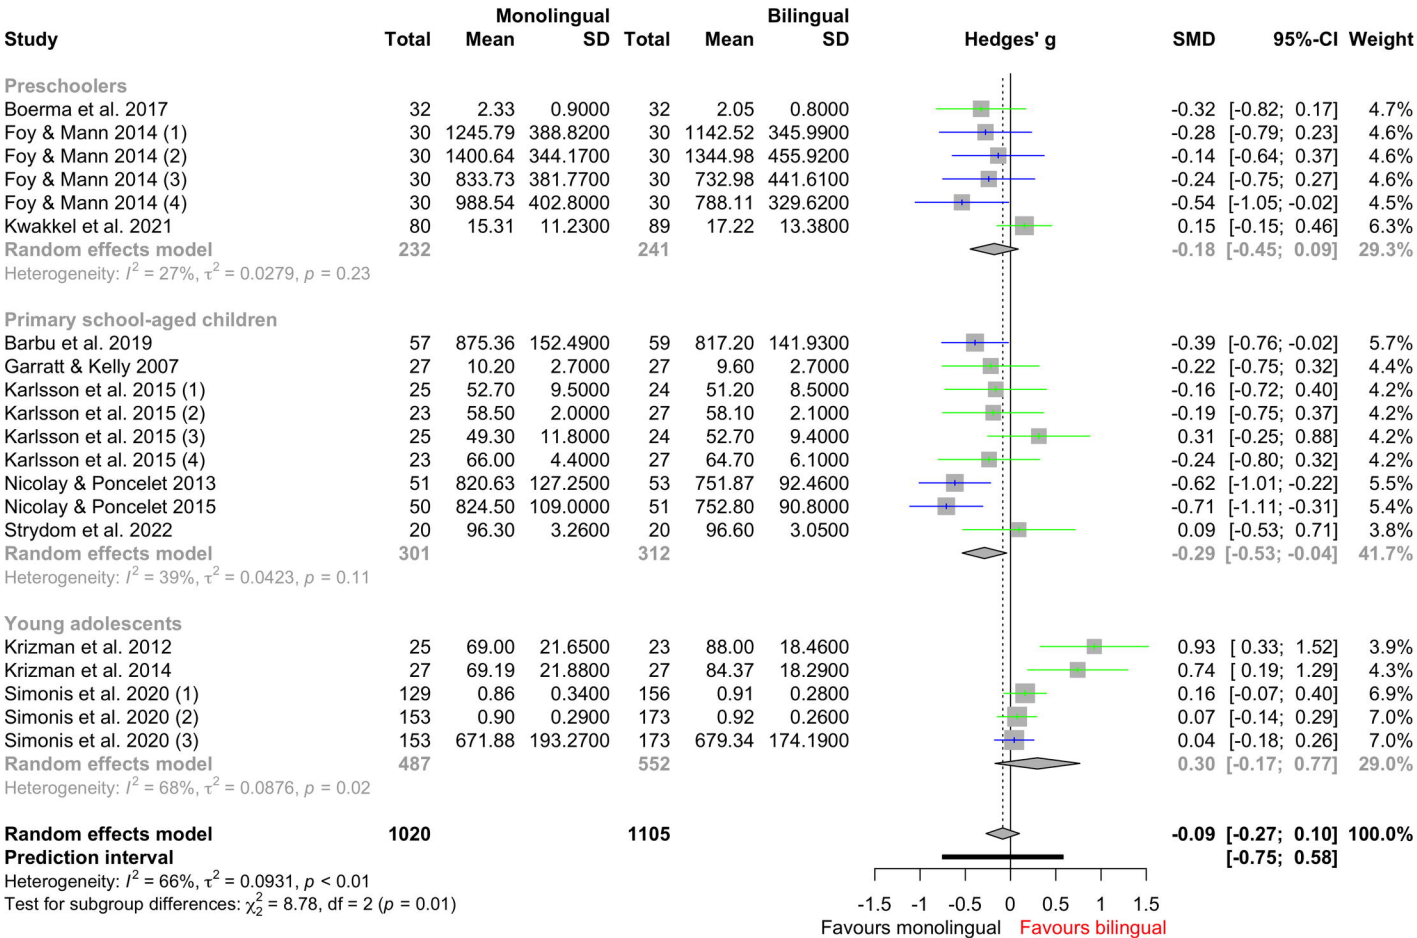

# Contour-Enhanced Funnel Plot

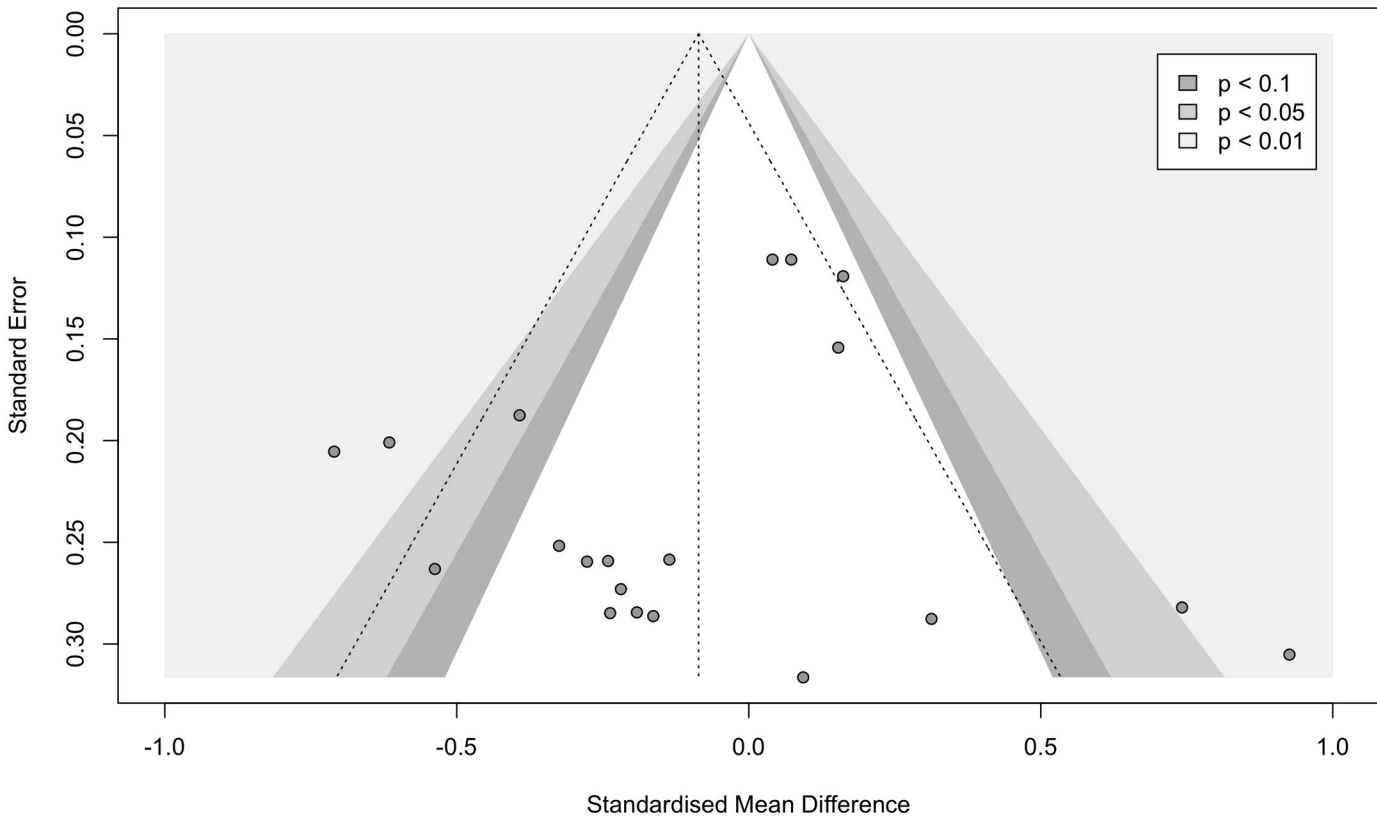

Source: https://www.medrxiv.org/content/10.1101/2023.03.31.23286915v2.full.pdf
